# Supplementary material for: Rapid Mast Cell Generation from Gata2 Reporter Pluripotent Stem Cells
Source: PubMed Central journal article supplement — Stem Cell Reports. 2018 Sep 6;11(4):1009–20. doi: 10.1016/j.stemcr.2018.08.007 (PMC6178197; doi:10.1016/j.stemcr.2018.08.007), 2018-09-06
Supplement: mmc1.pdf [file mmc1.pdf]

**Supplemental Information**

**Rapid Mast Cell Generation from *Gata2* Reporter Pluripotent Stem Cells**

**Mari-Liis Kauts, Bianca De Leo, Carmen Rodríguez-Seoane, Roger Ronn, Fokion Glykofrydis, Antonio Maglito, Polynikis Kaimakis, Margarita Basi, Helen Taylor, Lesley Forrester, Adam C. Wilkinson, Berthold Göttgens, Philippa Saunders, and Elaine Dzierzak**

## Supplemental Figures and Legends

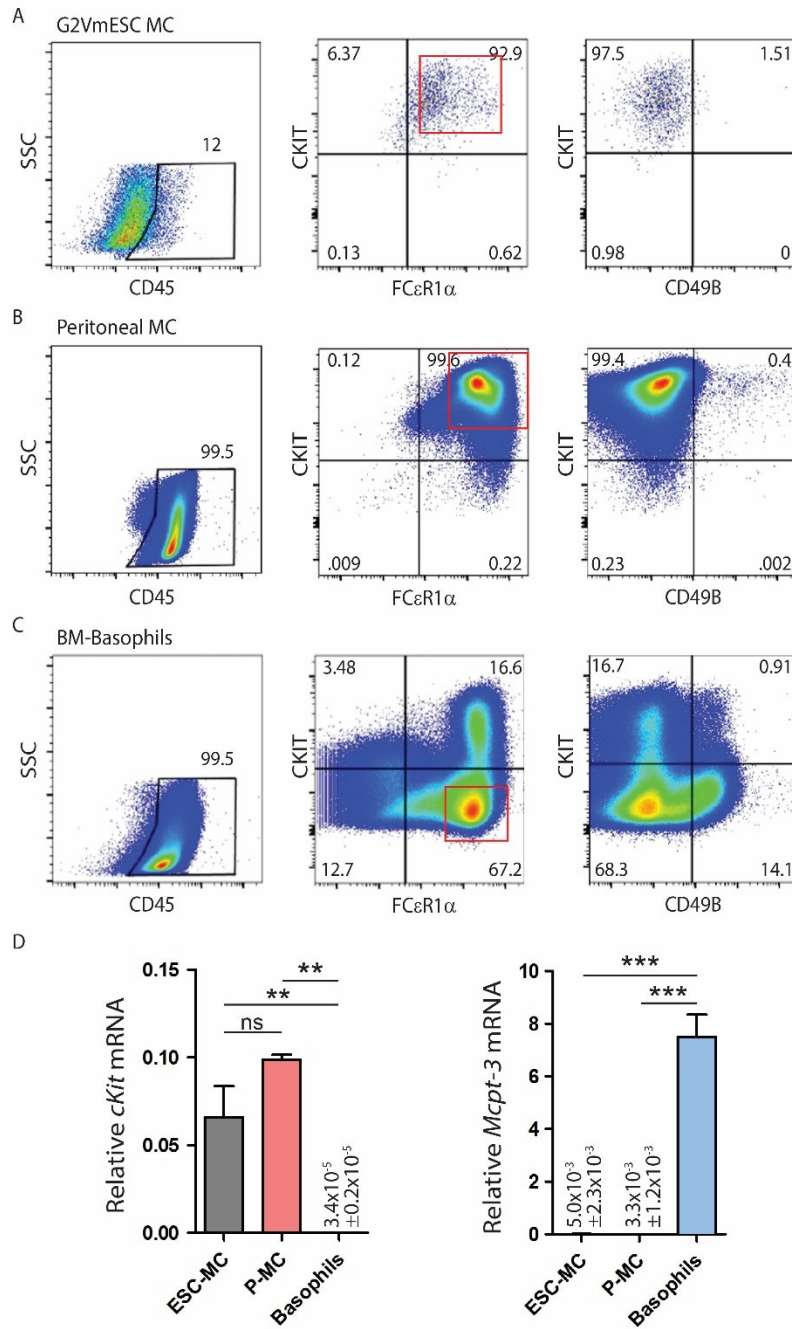

**Figure S1. G2V mESC differentiation cultures specifically enrich for mast cell and not for basophil generation.** Related to figures 1 and 2. FACS analysis of **(A)** ESC-MC isolated after stage 3, **(B)** Peritoneal MC, and **(C)** bone marrow (BM) cultures containing basophils for CD45, CKIT, FCεR1α and CD49B expression. Dot plots show staining for mast cell markers (CKIT+, FCεR1α+ CD49b-) and staining for basophil markers (CKIT-, FCεR1α+, CD49+). Percentages of cells in each quadrant are shown. Quadrants are set according to FMOs. Red boxes indicate the populations sorted for qRT-PCR analysis. **(D)** Gene expression analysis of mast cell specific marker *cKit* and basophil specific marker *Mcpt-8* in ESC-MC, Peritoneal (P)-MC and Basophils. Relative expression levels were normalized to *β-actin* expression. Mean±SEM, \*\*p<0.01, \*\*\*p<0.001, number of independent experiments=3.

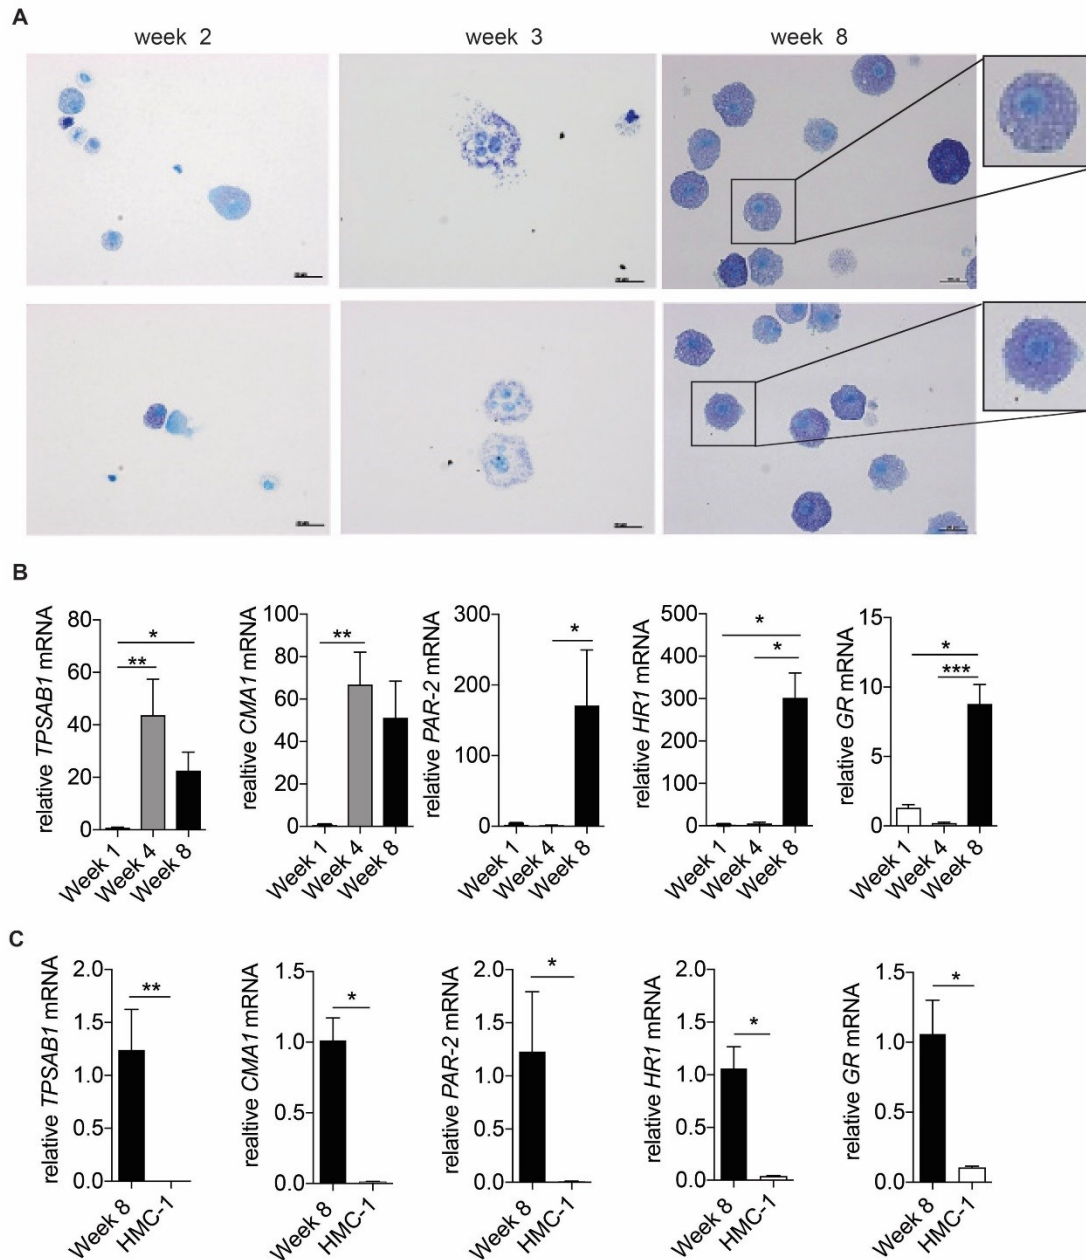

**Figure S2. Mast cell differentiation of human peripheral blood progenitor cells.** Related to Figure 3. **(A)** Human peripheral blood CD34<sup>+</sup> cells were isolated and mast cell differentiation performed during 8 weeks of culture. Images of toluidine blue stained cells from week 2, 3 and week 8 (first appearance of mature mast cells) cultures. Number of experiments (n)=3 for each differentiation week, scale bar=20  $\mu$ m. **(B)** Gene expression analysis of mast cell proteases: *tryptase* (*TPSAB1*), *chymase* (*CMA1*), surface receptors: *protease activated receptor 2*(*PAR-2*), *histamine receptor 1*(*HR1*) and inflammatory marker: *glucocorticoid receptor*(*GR*) in week 1, 4 and 8 differentiated peripheral blood CD34<sup>+</sup>progenitors. Expression levels were normalized to *GAPDH* and gene expression set as 1 in the undifferentiated cell sample. Week 1, n=7-10; week 4, n=6; week 8, n=2-8. Mean $\pm$ SEM, \*p<0.05, \*\*p<0.01, \*\*\*p<0.001. **(C)** Mast cell specific gene expression in mast cells derived via 8-week peripheral blood CD34<sup>+</sup> progenitor differentiation and human mast cell line (HMC-1). Gene expression in primary mast cell samples was normalized to *GAPDH* and to *cycliphillin D1* in HMC-1 samples. Week 8 n=3-4, HMC-1 n=3-5. Mean $\pm$ SEM, \*p<0.05, \*\*p<0.01.

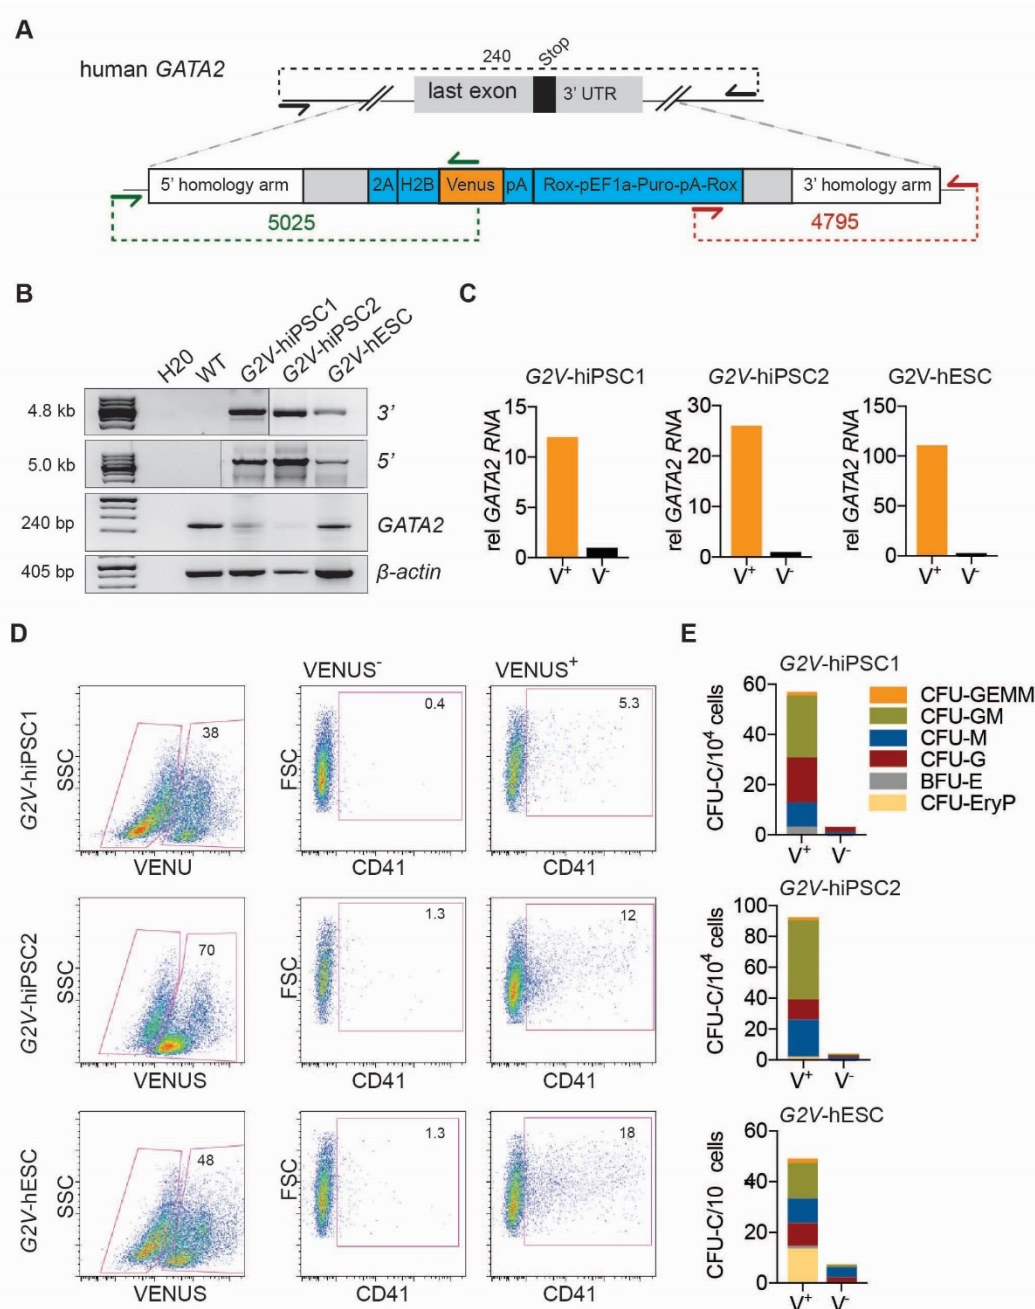

**Figure S3. Generation and hematopoietic differentiation of G2V reporter human pluripotent stem cells.** Related to Figure 3. **(A)** Schematic of the 2A-H2B-Venus reporter and *Rox* site flanked puromycin selection cassette insertion into the 3' untranslated region (UTR) of the human *GATA2* locus. Primers used for detection of wild type (WT) and recombined alleles are indicated (black=WT; green=5'-junction; red=3'-junction). **(B)** DNA PCR analysis of the genomic locus of *GATA2* and the recombined *GATA2* locus (5' and 3') in untargeted (WT) and targeted human ESC (G2V-hESC) and human iPSC clones (G2V-hiPSC-1 and -2). **(C)** Bar graphs showing relative *GATA2* gene expression in VENUS<sup>+</sup> (V<sup>+</sup>) and VENUS<sup>-</sup> (V<sup>-</sup>) FACS sorted cells from day 6 differentiated G2V-hESCs and G2V-iPSCs. *HPRT1* expression was used for normalization and *Gata2* expression was set as 1 in the V<sup>-</sup> fraction. **(D)** FACS analysis of hematopoietic marker CD41 expression on V<sup>-</sup> and V<sup>+</sup> populations of day 12 differentiated G2V-hiPSC1 and G2V-hESC. **(E)** Hematopoietic progenitor potential of V<sup>+</sup> and V<sup>-</sup> cells isolated from day 12 differentiated G2V-hiPSC1 (number of independent experiments(n)=2), G2V-hiPSC2 (n=1) and G2V-hESC (n=1) lines. Number of colony forming unit cells-culture (CFU-C) per 10<sup>4</sup> FACS sorted cells is shown. CFU types designated by colored bars are granulocyte, erythroid, macrophage, megakaryocyte (GEMM); granulocyte, macrophage (GM); macrophage (M); granulocyte (G); Burst forming unit-erythroid (BFU-E) and primitive erythroid (E). Representative data are shown.

**Supplemental Table 1. Primer sequences.**

| Murine RT-PCR                 | forward 5'-3'                                      | reverse 5'-3'                                    |
|-------------------------------|----------------------------------------------------|--------------------------------------------------|
| <i>cKit</i>                   | CCATCCATCCATCCAGCACA                               | CTGTTGCTGCACGTGTATGT                             |
| <i>FcεR1α</i>                 | ACCGTTCAAGACAGTGGA                                 | AGACGGGGCTCTCATAACTG                             |
| <i>mMCP-6</i>                 | TAATGACGAGCCTCTCCAC                                | CAGCCAGGTACCCTTCACTT                             |
| <i>mMCP-5</i>                 | TCATCTGCTGCTCCTTCTCC                               | ATAGACCTTCCCGCACAGTG                             |
| <i>Gata2</i>                  | ATGGCAGCAGTCTCTTCCAT                               | CACAGGCATTGCACAGGTAG                             |
| <i>MMCP-1</i>                 | CCACACTCCCGTCCTTACAT                               | ACATCATGAGCTCCAAGGGT                             |
| <i>CPA-3</i>                  | ACACCAACAAACCATGCCTC                               | TGGTGGTTAGGAGGCAGTTT                             |
| <i>β-actin</i>                | CACCACACCTTCTTACAATGAG                             | GTCTCAAACA TGATCTGGGTC                           |
| Murine TaqMan® qRT-PCR        |                                                    |                                                  |
| <i>cKit</i>                   | GATCTGCTCTGCGTCCTGTT                               | CTTGCAGATGGCTGAGACG                              |
| <i>FcεR1α</i>                 | CCATGGATCCTTTGACATCAG                              | GATCACCTTGCGGACATTC                              |
| <i>FcεR1γ</i>                 | CTTACCCTACTCTACTGTCGACTCAA                         | AGGCCCGTGTAGACAGCAT                              |
| <i>Gata2</i>                  | TGGCACCACAGTTGACACA                                | TGGCACCACAGTTGACACA                              |
| <i>mMCP-5</i>                 | ATCTGCTGCTCCTTCTCCTG                               | ACTCCGTGCCTCCAATGA                               |
| <i>mMCP-6</i>                 | TGCTGTGTGCTGGAAATACC                               | CCCTTCACTTTGCAGACCA                              |
| <i>CPA-3</i>                  | GCTATTAATTCCTTATGGCTACACATT                        | GTGGCAATCCTTGCAACTTT                             |
| <i>mMCPT8</i>                 | CCACTCCCGGCCCTATATG                                | TGCTGTCATTACGATGTCTCTTG                          |
| <i>β-actin</i>                | CACCACACCTTCTTACAATGAG                             | GTCTCAAACA TGATCTGGGTC                           |
| Human TaqMan® qRT-PCR         |                                                    |                                                  |
| <i>TPSAB1</i>                 | CCTGCCTCAGAGACCTTCC                                | ACCTGCTTCAGAGGAAATGG                             |
| <i>CMA1</i>                   | TTCACCCGAATCTCCCATTA                               | TCAGGATCCAGGATTAATTTGC                           |
| <i>PAR-2</i>                  | GAGCCATGTCTATGCCCTGT                               | CGATGCAGCTGTTAAGGGTAG                            |
| <i>HR1</i>                    | AGAATCAGACCTGGGTGGAA                               | AATGAGTCTGAGGCTCCCATAG                           |
| <i>GR</i>                     | TCCCTGGTCTGAACAGTTTTT                              | GCTGGATGGAGGAGAGCTTA                             |
| human qRT-PCR                 |                                                    |                                                  |
| <i>GATA2</i>                  | CAGCAAGGCTCGTTCCTGTT                               | GGCTTGATGAGTGGTCCGT                              |
| <i>HPRT-1</i>                 | CCTGGCGTCGTGATTAGTGAT                              | AGACGTTCACTCCTGTCCATAA                           |
| human PCS genotyping          |                                                    |                                                  |
| <i>β-ACTIN</i>                | AGCTGTCACATCCAGGGTCC-                              | CCTCGGCCACATTGTGAACT                             |
| 5'-junction                   | AGTGCTTCCAGTGTACCCCA                               | TGGTCGAGCTGGACGGCGA                              |
| 3'-junction                   | GAAGGACCGCGCACCTGGT                                | GATTCTGAGGTCTGGGCTCTGG                           |
| wt <i>GATA2</i>               | ACCTCCCGCCCTTCAGCC                                 | GAGGGGGTGCTGGGCCGAG                              |
| human CRISPR/Cas9 engineering |                                                    |                                                  |
| <i>GATA2 Out-5</i>            | <i>ttgcggccgc</i><br>GCAAAATTCCCAGGACCTGCTC        | <i>ccaagctt</i><br>TGCAAAACAAACAGGAGAAAGG<br>ACC |
| <i>GATA2 Out-3</i>            | <i>ccaagcttgatcc</i><br>TCCTACCTGATGCATAGTGGC      | <i>ccctcgag</i><br>GAGTTCTGGGGCCTAGAGCTAT<br>GG  |
| <i>GATA2 In-5</i>             | <i>cggaattc</i> CTGGCTTCCTGGGACCCTCAG              | <i>gggctagcgtcgac</i><br>GCCCATGGCGGTACCATG      |
| <i>GATA2 In-3</i>             | <i>ccctcgagggcgccgc</i><br>GGAACAGATGGACGTCGAGGACC | <i>aggcgccgc</i><br>AGGACTTGGGACAGCTCAGACC<br>AC |

## Supplemental experimental procedures

### Generation of human GATA2-Venus hESCs and iPSCs

G2V hPSCs were generated by CRISPR/Cas9 engineering. *GATA2-T2A-H2B-Venus-pA-EF1 $\alpha$ -Puro-pA* donor vector was generated from a BAC (CTD-3248G10; Life Technologies). pSIM18Hygro (gift from P. Liu, Wellcome Trust Sanger Institute) transformed bacteria (heat-inducible recombinase expression) were used. Mini-homology arms (5'-out, 3'-out, 5'-in and 3'-in) were generated by PCR amplification of BAC DNA using primers (Suppl Table 1).

5'-out arm was digested with NotI/HindIII and 3'-out arm with XhoI/HindIII and ligated to XhoI/NotI digested, gel purified pBlueScript to generate outarm-pBlueScript. 5'-in arm was digested with EcoRI/NheI and 3'-in arm with XhoI/NotI and ligated with a NheI/Ascl digested *ZeoR* (gift from P.Liu) and EcoRI/NotI digested pBlueScript to generate 5'-in-arm-*ZeoR*-3'-in-arm-pBlueScript. The out-arm-pBlueScript backbone was PCR amplified for recombineering. Competent BAC/pSIM18Hygro bacteria were transformed with PCR amplified out-arm-pBlueScript to generate the full homology region within pBlueScript. Full homology region-pBlueScript and a EcoRV/NotI linearised 5'-in-arm-*ZeoR* 3'-in-arm fragment were transformed into competent SIM18 E.coli (strain with stable phage incorporated SIM18 recombinase to replace the *GATA2* stop codon with *ZeoR*). *ZeoR* was digested from the homology arms using Sall/Ascl and homology arms ligated with a SpeI/Ascl digested *T2A-Venus-pA-EF1 $\alpha$ -PuroR-pA* DNA fragment (provided by W. Wang, Wellcome Trust Sanger Institute) and sequencing verified.

*GATA2*-stop codon-targeting gRNA was ligated to *pSpCas9(BB)-2AGFP(PX458)* (Addgene) vector.  $8 \times 10^5$  hPSCs were electroporated with Human Stem Cell Nucleofector Kit 2 (A-023), AMAXA Nucleofector (Lonza). 3 $\mu$ g of *GATA2-T2A-H2B-Venus-pA-EF1 $\alpha$ -Puro-pA-pBlueScript* and 2 $\mu$ g of *gRNA-pSpCas9(BB)-2A-GFP* were used for transfection and cells seeded on puromycin-resistant MEFs (DR4, ATCC). 48 hours later puromycin selection was initiated (1 $\mu$ g/ml, 1 week). 33 iPSC and 16 ESC prospective G2V clones were established and PCR genotyped (primers spanning 3'(4795bp) and 5'(5025bp) junctions of the construct and *GATA2* genomic sequence (Fig3A). *GATA2* WT allele primers(240bp) assessed the homo-/heterozygosity of the insertion. Correctly integrated clones were karyotyped. 1 clone of G2V-hESC and 2 clones of G2V-hiPSC with normal karyotypes were used.

### hPB CD34<sup>+</sup> cell isolation and differentiation

Peripheral blood (PB; 40-80ml, venipuncture) was collected under the LREC08/S1103/38 (MRC-CIR) in 4ml of sodium citrate (3.8%, Sigma Aldrich) from healthy female donors (age 24-47, number of independent experiments=20). 10ml PB in 25ml of complete StemPro serum-free medium (Gibco), 2 mM L-glutamine, 100 IU/ml penicillin, and 50 $\mu$ g/ml streptomycin (LifeTechnologies) was layered onto 14 ml of Histopaque (Sigma Aldrich), centrifuged (675g, 20min, RT) and mononuclear cell layer harvested, washed twice and resuspended in PBS, 0.5% bovine serum albumin (Sigma Aldrich) and 2mM ethylene diamine tetra-acetic acid (EDTA, Gibco). CD34<sup>+</sup> enrichment was by MicroBead Kit (MACS Miltenyi Biotec), Magnetic separation and mini MACS separator (Miltenyi Biotec). Cells were counted on a haemocytometer (Immune Systems).

Mast cell differentiation was performed by CD34<sup>+</sup> cell culture in Stem-Pro34<sup>®</sup> SFM (Gibco) with rhSCF, rhIL-6, and rhIL-3 (only week 1) (Kirshenbaum and Metcalfe, 2006). Hemi-depletion/feeding was performed weekly. Recovered cells were washed and resuspended in 25ml StemPro media with rhIL-6 and rhSCF for further differentiation. Complete differentiation (95-100%) was achieved over 8–10-weeks.

Control HMC-1 cells were cultured at  $4 \times 10^5$  cells/ml (37°C, 5%CO<sub>2</sub>) in IMDM, 25mM HEPES, 3.024g/l sodium bicarbonate, 4mM L-glutamine (ThermoFisher Scientific), 10% iron-supplemented calf serum (Hyclone, USA), 1.2mM  $\alpha$ -thioglycerol (Sigma Aldrich) and 10ml/l P/S (Sigma Aldrich).
